# Supplementary material for: Multifunctional bipyramid-Au@ZnO core–shell nanoparticles as a cathode buffer layer for efficient non-fullerene inverted polymer solar cells with improved near-infrared photoresponse
Source: Royal Society of Chemistry journal article supplement (doi:10.1039/c8ta10549a), 2019-01-01
Supplement: c8ta10549a1.pdf [file c8ta10549a1.pdf]

## Supporting Information

### Multifunctional bipyramid-Au@ZnO core-shell nanoparticles as a cathode buffer layer for efficient non-fullerene inverted polymer solar cells with improved near-infrared photoresponse

Jinyan Li, Yiming Bai, Bo Yang, Jin Zhang, Xiaohan Chen, Yun Yang, Jianhui Hou, Zhan'ao Tan\*

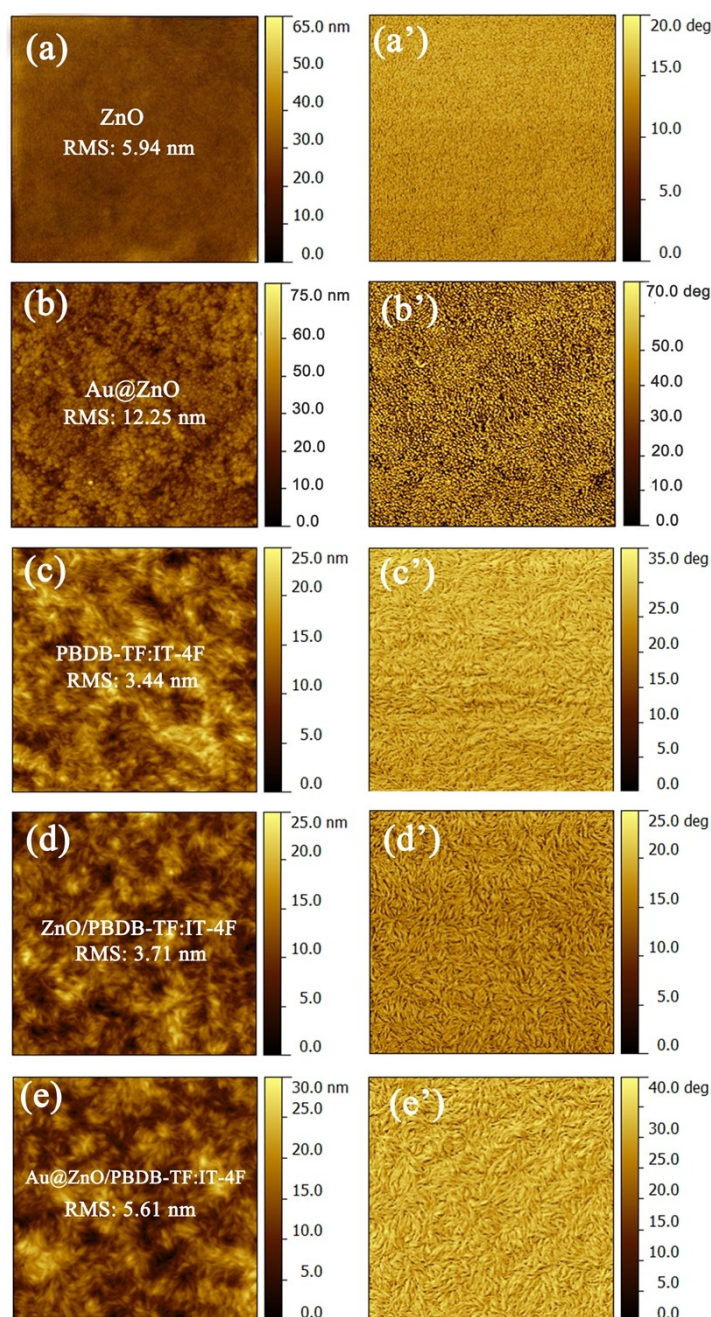

**Fig. S1.** AFM topography and phase images of the solid thin films of (a) and (a') ZnO; (b) and (b') Au@ZnO; (c) and (c') PBDB-TF:IT-4F; (d) and (d') ZnO/PBDB-TF:IT-4F; and (e) and (e') Au@ZnO/PBDB-TF:IT-4F on glass substrates, respectively.

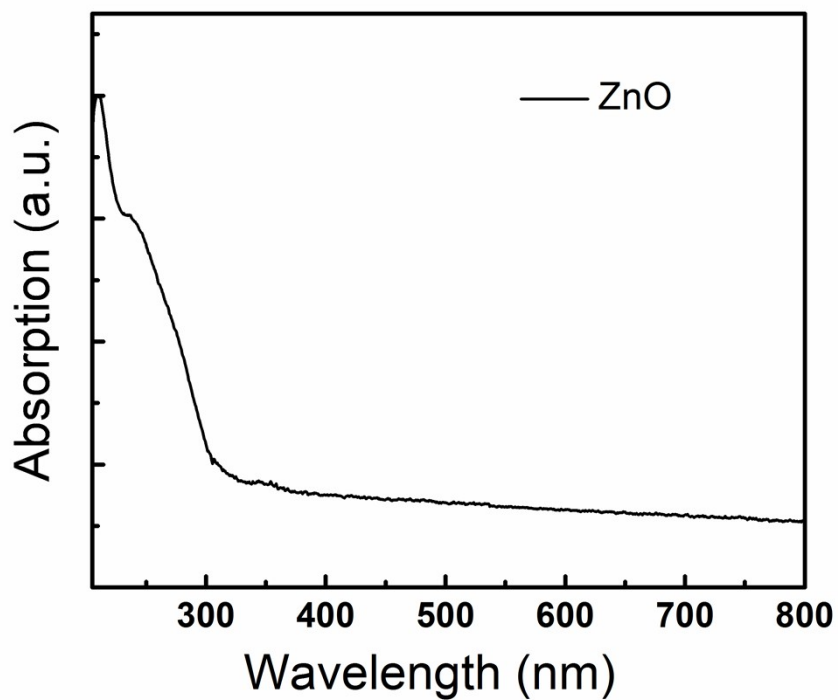

**Fig. S2.** The absorption spectra of ZnO.

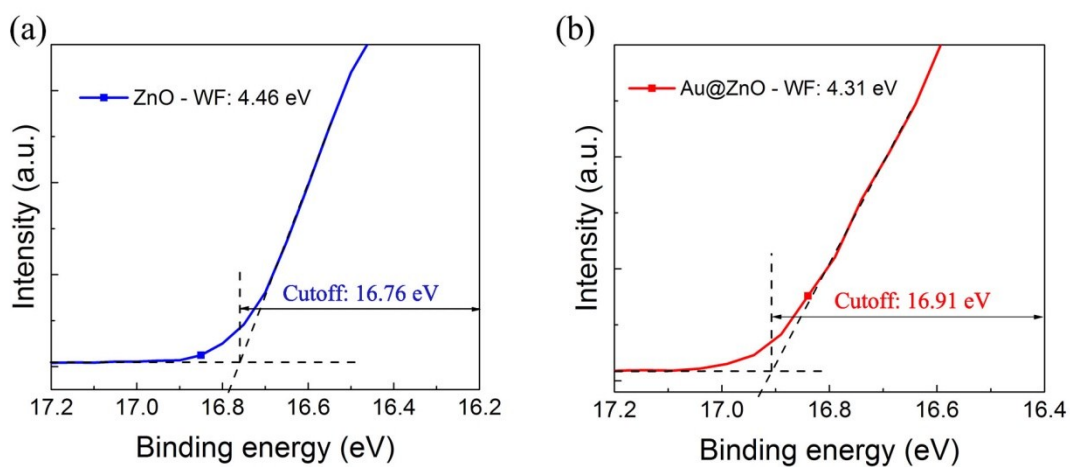

**Fig. S3.** UPS spectra of high-binding energy secondary-electron cutoff of (e) ZnO and (f) Au@ZnO.

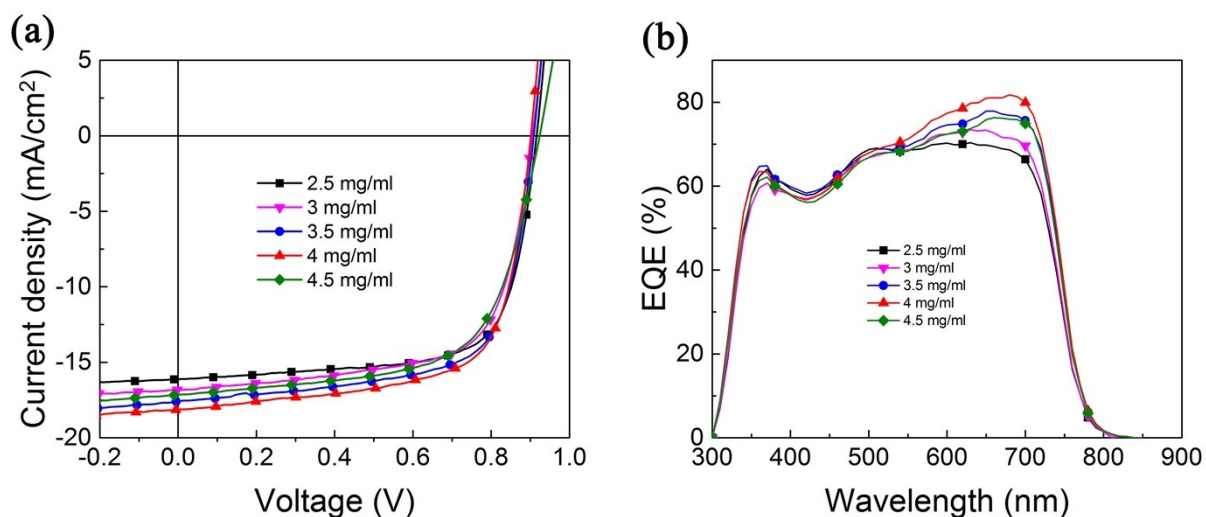

**Fig. S4.** Current density-voltage ( $J-V$ ) curves and external quantum efficiency ( $EQE$ ) spectra of PSCs based on PBDBTDD:ITIC with different concentrations of Au@ZnO used to form the CBL.

**Table S1.** Photovoltaic parameters of PSCs based on PBDBTDD:ITIC with different concentration of Au@ZnO as CBL.

| Concentration<br>[mg/mL] | $V_{oc}$<br>[V] | $J_{sc}$<br>[mA cm <sup>-2</sup> ] | FF<br>[%] | PCE<br>[%] |
|--------------------------|-----------------|------------------------------------|-----------|------------|
| 2.5                      | 0.89            | 15.69                              | 67.19     | 9.38       |
| 3.0                      | 0.88            | 16.53                              | 65.56     | 9.53       |
| 3.5                      | 0.88            | 17.75                              | 66.27     | 10.35      |
| 4.0                      | 0.88            | 18.86                              | 65.53     | 10.88      |
| 4.5                      | 0.87            | 17.46                              | 65.34     | 9.93       |

**Table S2.** Short lifetime  $\tau_1$ , fast lifetime  $\tau_2$  and average lifetime  $\tau_{\text{avg}}$  for the solid thin films of PBDBTBD:ITIC, and PBDB-TF:IT-4F with ZnO or Au@ZnO spin-coated on quartz glass.

| Solid film           | $\tau_1$<br>[ns] | $B_1$<br>[%] | $\tau_2$<br>[ns] | $B_2$<br>[%] | $\tau_{\text{avg}}$<br>[ns] |
|----------------------|------------------|--------------|------------------|--------------|-----------------------------|
| PBDBTBD:ITIC         | 1.05             | 0.05         | 12.19            | 0.0132       | 9.26                        |
| ZnO/PBDBTBD:ITIC     | 0.16             | 0.16         | 10.65            | 0.0002       | 5.70                        |
| Au@ZnO/PBDBTBD:ITIC  | 0.25             | 0.22         | 9.47             | 0.0032       | 3.52                        |
| PBDB-TF:IT-4F        | 0.72             | 0.08         | 11.46            | 0.0114       | 8.29                        |
| ZnO/PBDB-TF:IT-4F    | 0.19             | 0.29         | 14.86            | 0.0031       | 6.78                        |
| Au@ZnO/PBDB-TF:IT-4F | 0.17             | 0.16         | 7.30             | 0.0014       | 2.15                        |
